# Supplementary material for: Solubility of CO2 in 2-Amino-2-methyl-1-propanol (AMP) and 3-(Methylamino)propylamine (MAPA): Experimental Investigation and Modeling with the Cubic-Plus-Association and the Modified Kent-Eisenberg Models
Source: MDPI journal article supplement (doi:10.3390/separations9110338), 2022-11-02
Supplement: s1 [file s1]

Supplementary Information for:

Article

# Solubility of CO<sub>2</sub> in 2-amino-2-methyl-1-propanol (AMP) and 3-(methylamino)propylamine (MAPA): Experimental investigation and modeling with the Cubic-Plus-Association and the modified Kent-Eisenberg models

Giannis Kontos<sup>1</sup>, Maria Anna Soldatou<sup>1</sup>, Evangelos Tzimpilis<sup>1</sup> and Ioannis Tsivintzelis<sup>1,\*</sup>

<sup>1</sup>Department of Chemical Engineering, Aristotle University of Thessaloniki, 54124 Thessaloniki, Greece.

\*Correspondence: tioannis@cheng.auth.gr

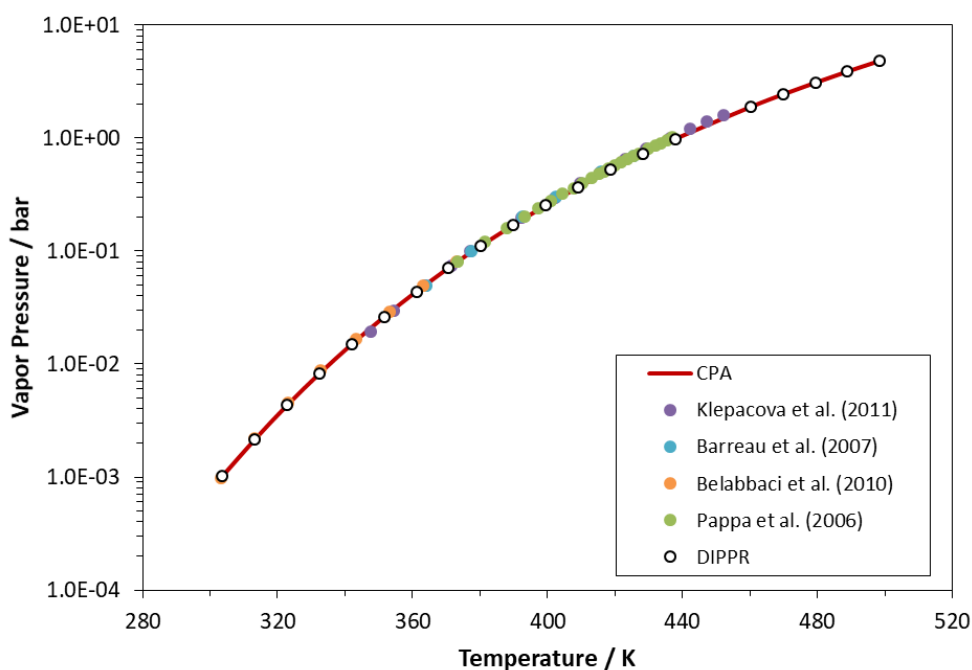

**Figure S1.** Vapor pressure of AMP. Experimental data (points, [54, 62-65]) and CPA correlations (lines).

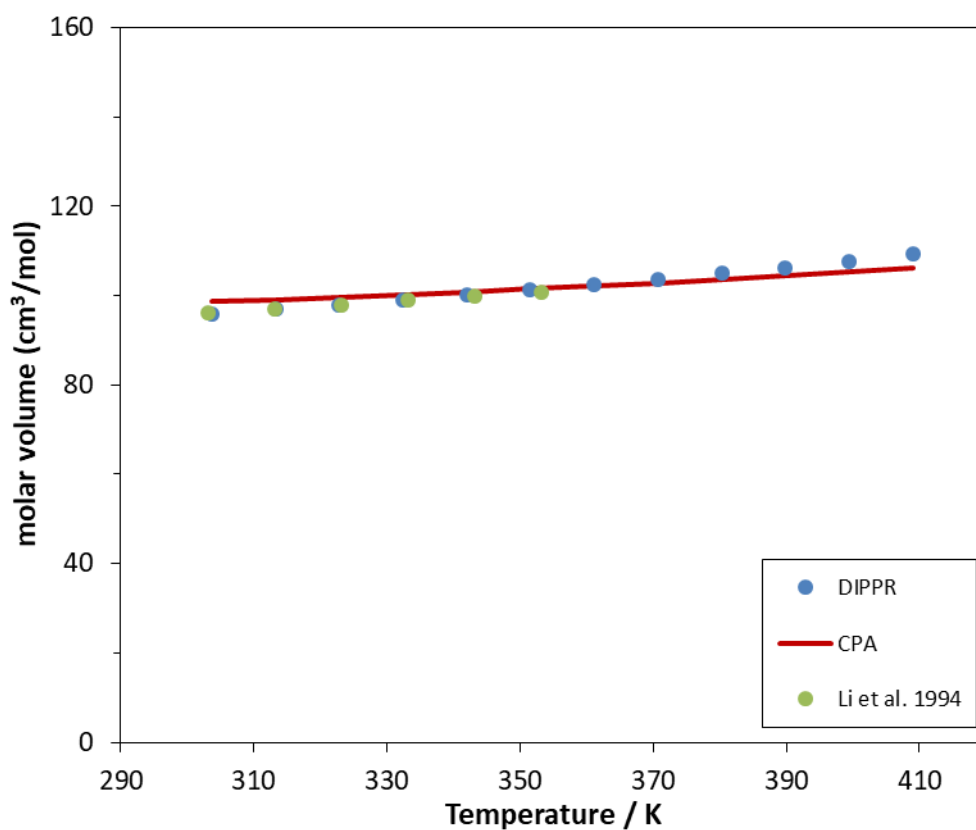

**Figure S2.** Molar Volume of AMP. Experimental data (points, [54, 66]) and CPA correlations (lines).

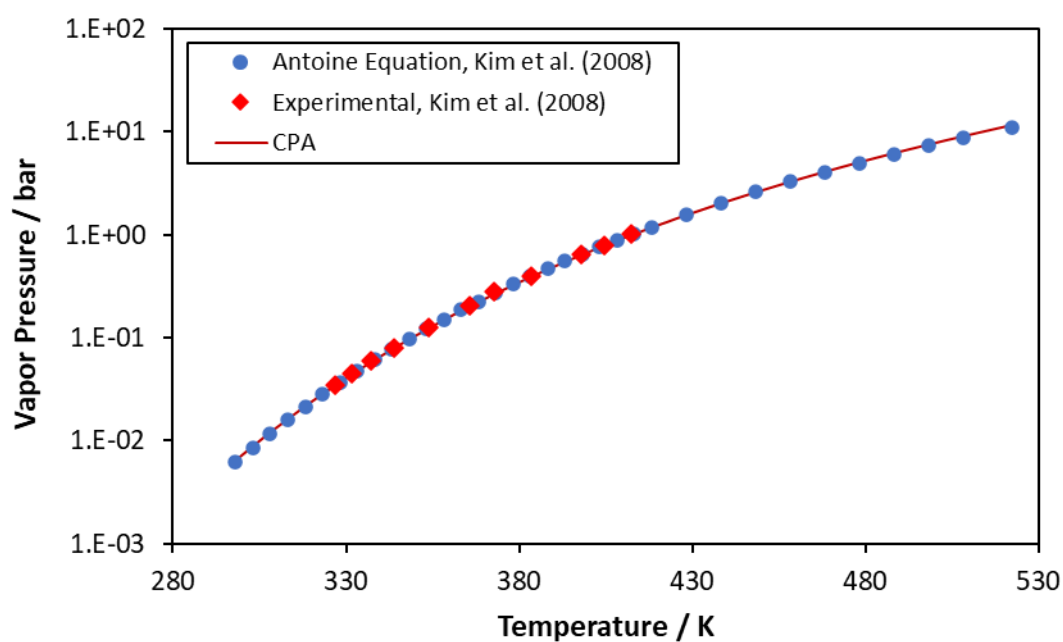

**Figure S3.** Vapor pressures of MAPA. Experimental data (points, [67]) and CPA correlations (lines).

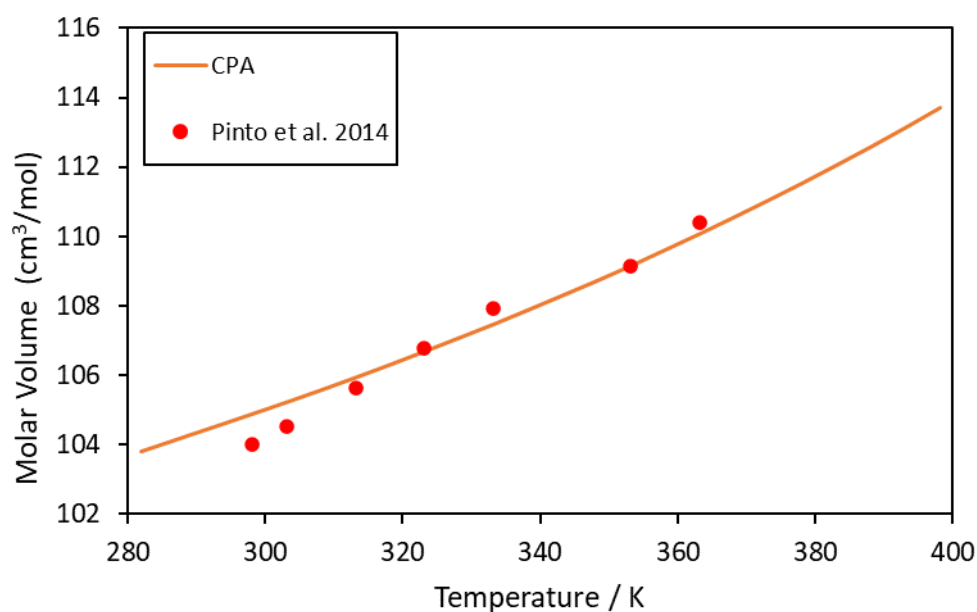

**Figure S4.** Molar Volume of MAPA. Experimental data (points, [68]) and CPA correlations (lines).

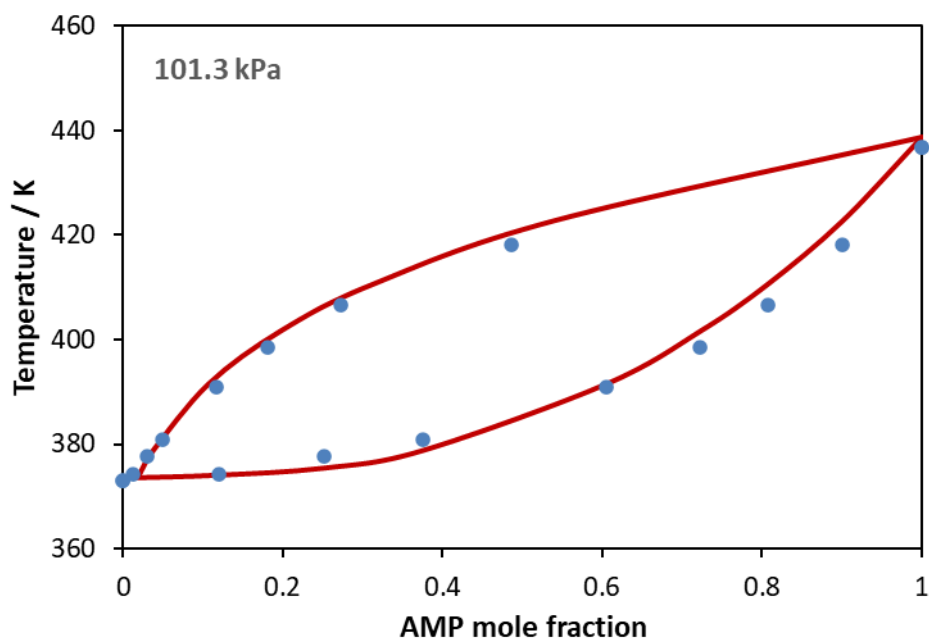

**Figure S5.** AMP- water VLE. Experimental data from Pappa et al. [65] (points) and CPA correlations (lines).

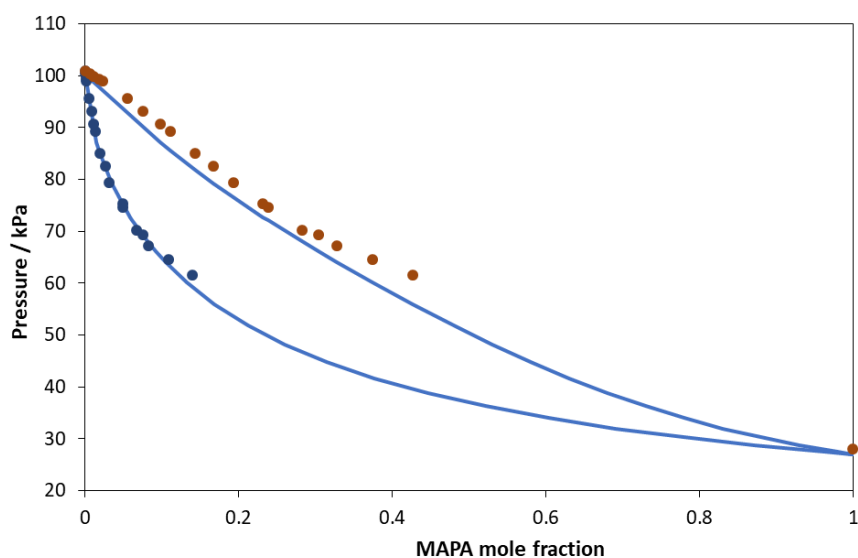

**Figure S6.** MAPA- water VLE. Experimental data from Kim et al. [67] (points) and CPA correlations (lines).

**Table S1.** Summary of literature sources of experimental solubility data used for adjusting the parameters A and D (equations (36)) for AMP-CO<sub>2</sub>-H<sub>2</sub>O system.

| Composition (molality) | Temperature (K)    | No. of data points | Reference                     |
|------------------------|--------------------|--------------------|-------------------------------|
| 1.98                   | 322.5              | 4                  | Arcis et al. [39]             |
| 2.46                   | 313, 323, 333, 353 | 8                  | Haji-sulaiman and Aroua [32]  |
| 4.80                   | 373, 383           | 8                  | Li et al. [46]                |
| 2.46                   | 313, 333, 363      | 9                  | Narku-Tetteh et al. [49]      |
| 4.81                   | 313, 333, 353      | 20                 | Park et al. [36]              |
| 2.46                   | 313, 373           | 20                 | Roberts and Mather [28]       |
| 2.46                   | 313, 343           | 11                 | Teng and Mather [30]          |
| 4.81                   | 313, 333, 353      | 28                 | Tong et al. [43]              |
| 2.46                   | 313, 353           | 10                 | Tontiwachwuthikul et al. [31] |
| <b>Total</b>           |                    | <b>111</b>         |                               |

**Table S2.** Summary of literature sources of experimental solubility data used for adjusting the parameters A and D (equation (36)) for MAPA-CO<sub>2</sub>-H<sub>2</sub>O system.

| Composition (molality) | Temperature (K) | No. of data points | Reference          |
|------------------------|-----------------|--------------------|--------------------|
| 1.11, 2.47             | 313, 353, 393   | 94                 | Arshad et al. [10] |
| <b>Total</b>           |                 | <b>94</b>          |                    |

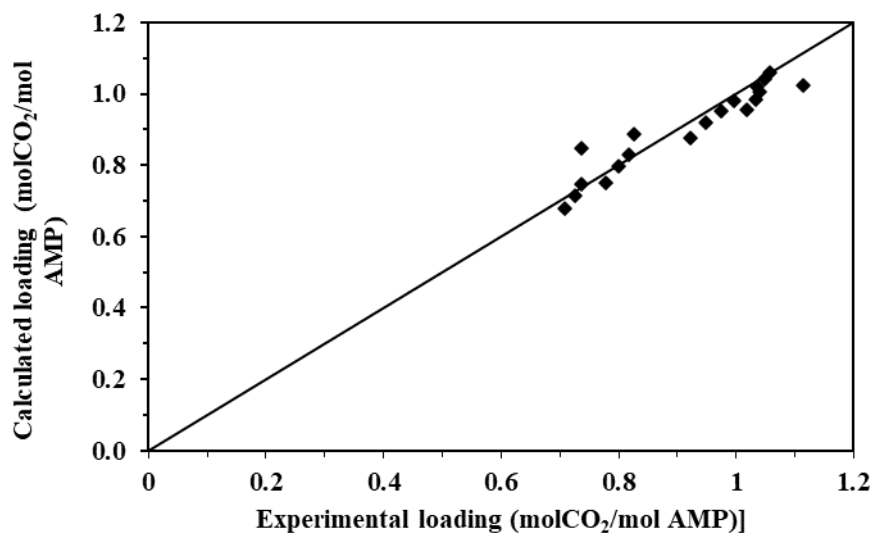

**Figure S7.** Parity plot of calculated (with the Kent Eisenberg model) against experimental (this work) loadings of aqueous AMP solutions.

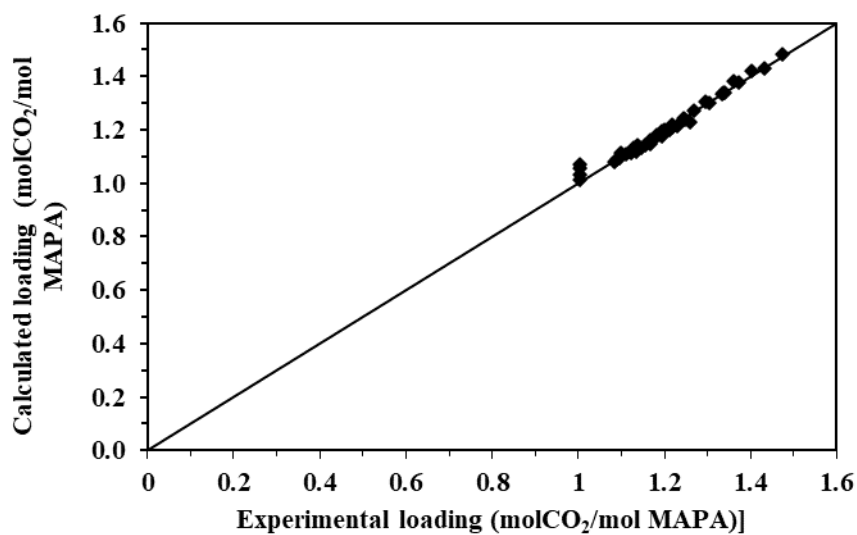

**Figure S8.** Parity plot of calculated (with the Kent Eisenberg model) against experimental (this work) loadings of aqueous MAPA solutions.

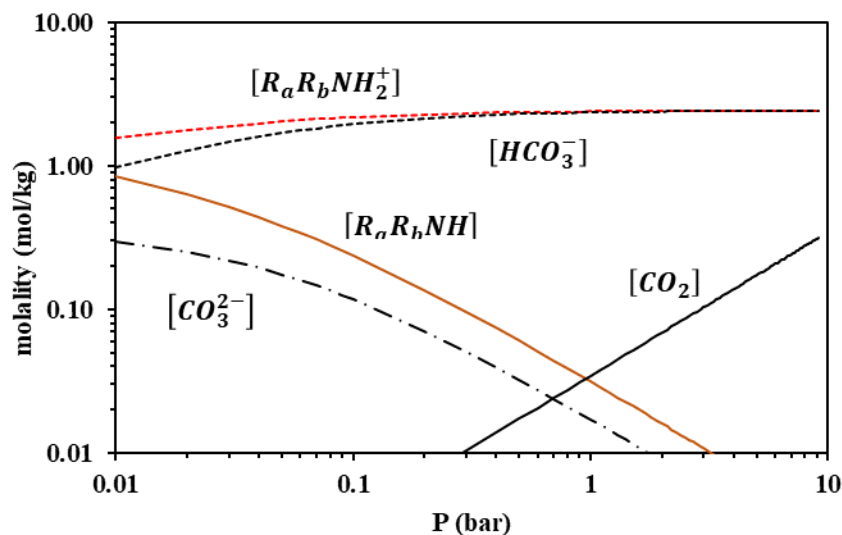

**Figure S9.** Liquid-phase speciation for AMP-CO<sub>2</sub>-H<sub>2</sub>O system at 298 K, calculated using the modified Kent-Eisenberg model (calculations performed for the CO<sub>2</sub> loading of 17.7% wt. AMP aqueous solutions).

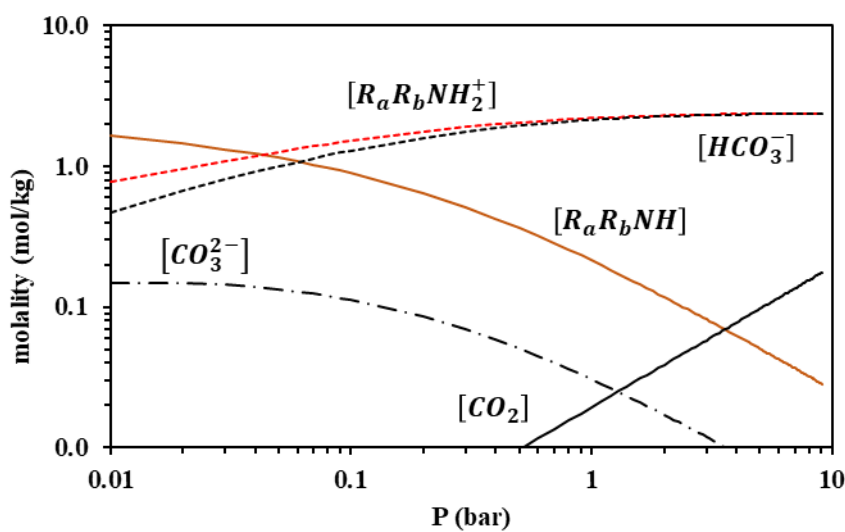

**Figure S10.** Liquid-phase speciation for AMP-CO<sub>2</sub>-H<sub>2</sub>O system at 323 K, calculated using the modified Kent-Eisenberg model (calculations performed for the CO<sub>2</sub> loading of 17.7% wt. AMP aqueous solutions).

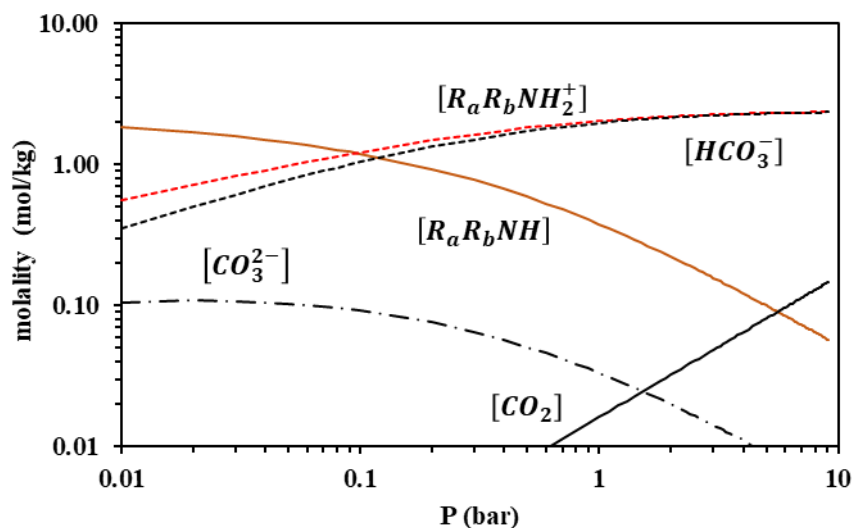

**Figure S11.** Liquid-phase speciation for AMP-CO<sub>2</sub>-H<sub>2</sub>O system at 333 K, calculated using the modified Kent-Eisenberg model (calculations performed for the CO<sub>2</sub> loading of 17.7% wt. AMP aqueous solutions).

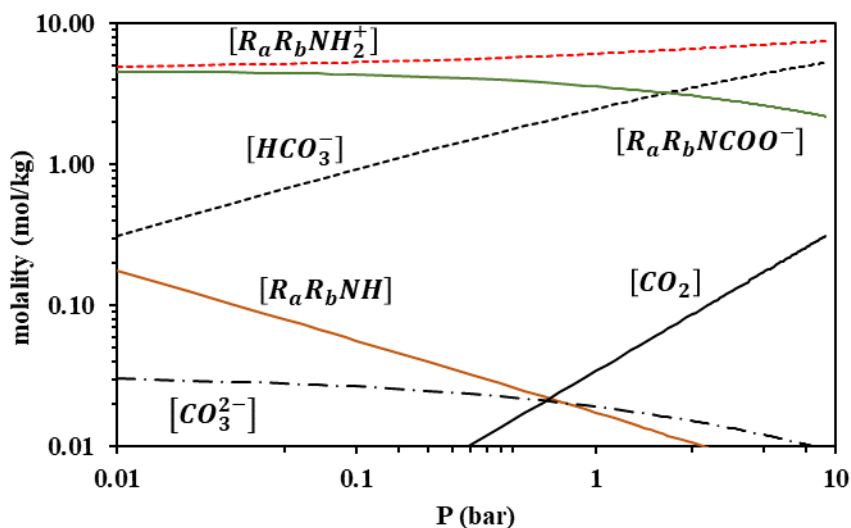

**Figure S12.** Liquid-phase speciation for MAPA-CO<sub>2</sub>-H<sub>2</sub>O system at 298 K, calculated using the modified Kent-Eisenberg model (calculations performed for the CO<sub>2</sub> loading of 30.0% wt. MAPA aqueous solutions).

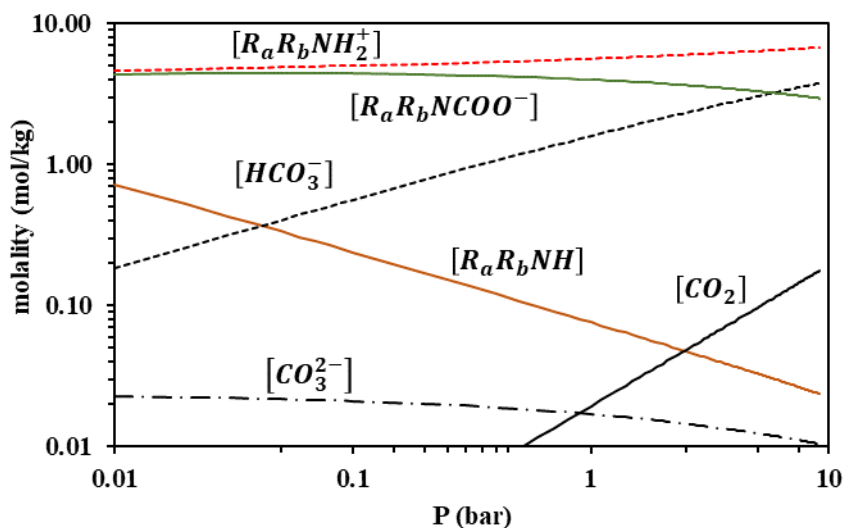

**Figure S13.** Liquid-phase speciation for MAPA-CO<sub>2</sub>-H<sub>2</sub>O system at 323 K, calculated using the modified Kent-Eisenberg model (calculations performed for the CO<sub>2</sub> loading of 30.0% wt. MAPA aqueous solutions).

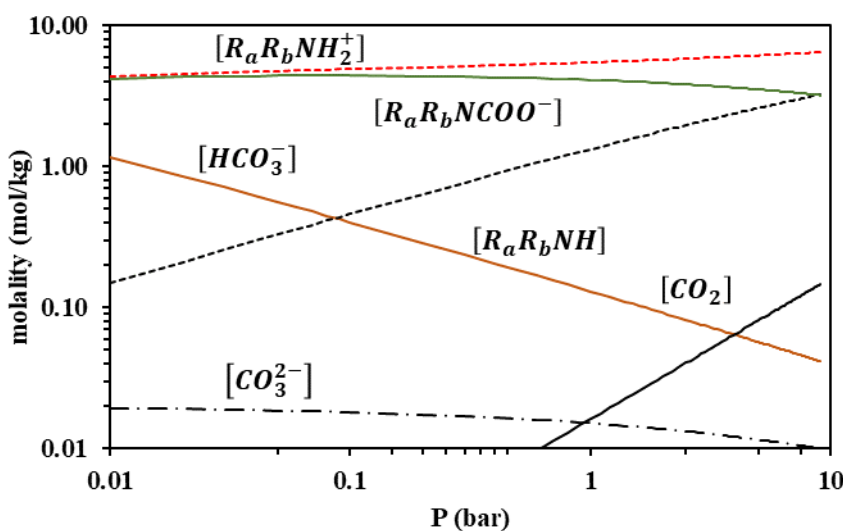

**Figure S14.** Liquid-phase speciation for MAPA-CO<sub>2</sub>-H<sub>2</sub>O system at 333 K, calculated using the modified Kent-Eisenberg model (calculations performed for the CO<sub>2</sub> loading of 30.0% wt. MAPA aqueous solutions).
