# Supplementary material for: Solubility of CO2 in 2-Amino-2-methyl-1-propanol (AMP) and 3-(Methylamino)propylamine (MAPA): Experimental Investigation and Modeling with the Cubic-Plus-Association and the Modified Kent-Eisenberg Models
Source: MDPI journal article supplement (doi:10.3390/separations9110338), 2022-11-02
Supplement: s1 [file s1]

Archive with 1 entries (1 files):
- separations-1958462-supplementary.pdf
